# Supplementary material for: Repair of multiple simultaneous double-strand breaks causes bursts of genome-wide clustered hypermutation
Source: PubMed Central journal article supplement (PMC6786661; doi:10.1371/journal.pbio.3000464), 2019-09-30

HaploidDiploidCancer

A.

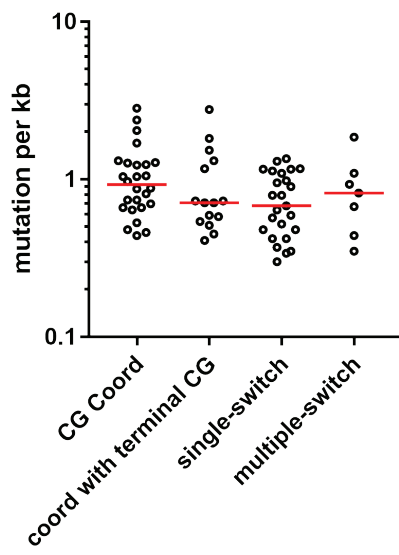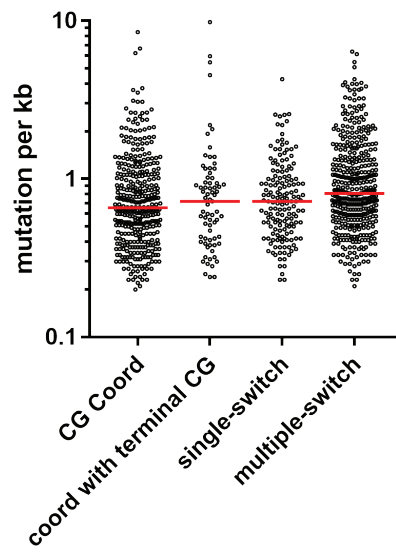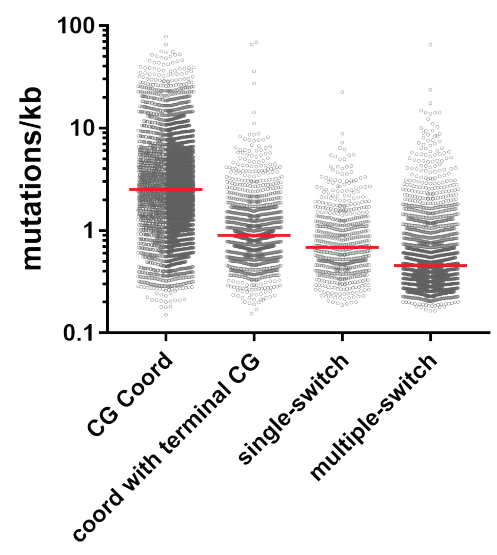

B.

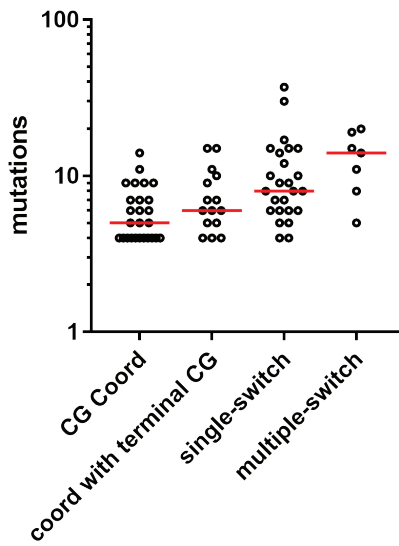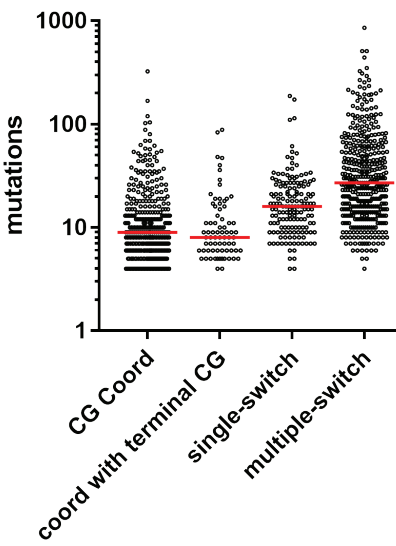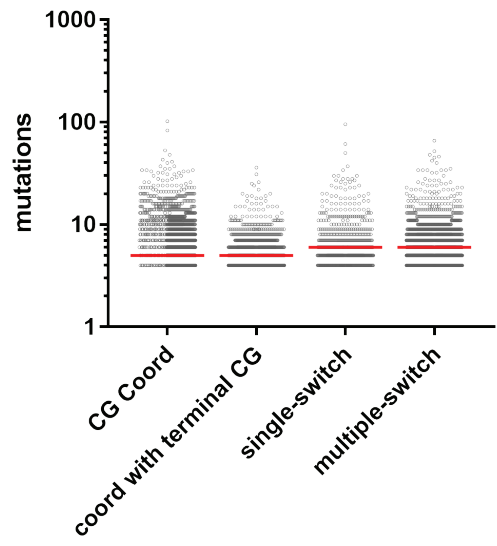

C.

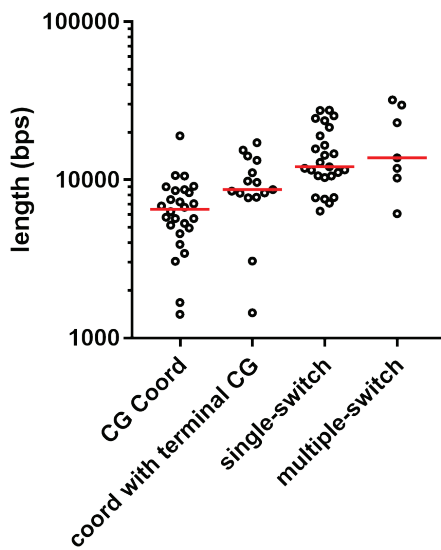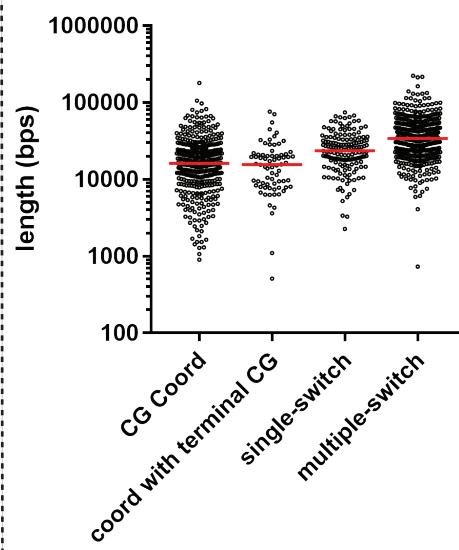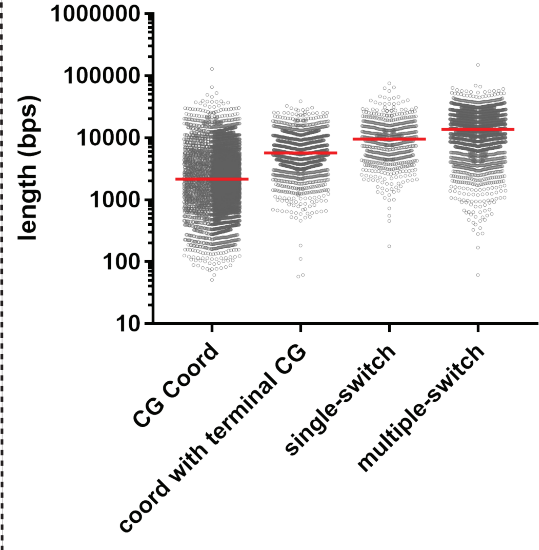

# Supplemental Figure 3 (D)

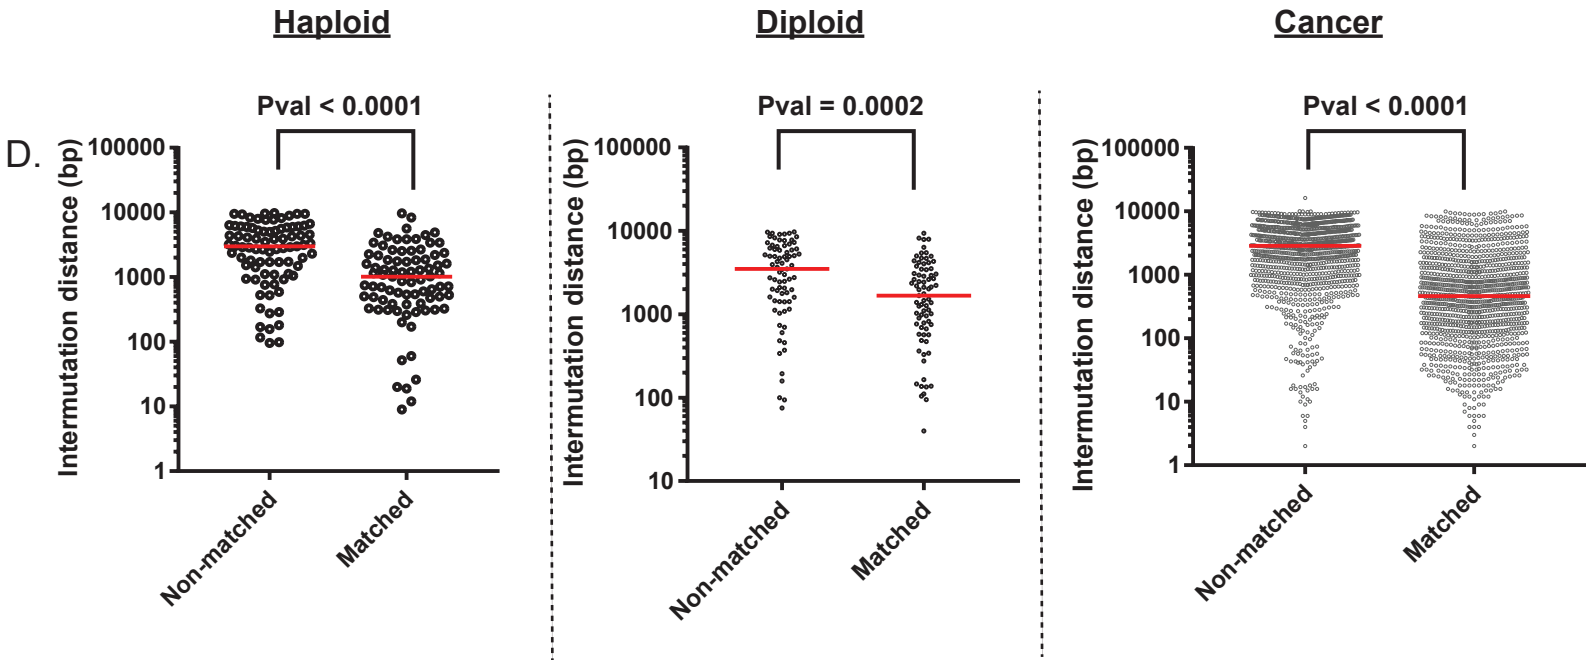

Supplement: pbio.3000464.s003.pdf [file pbio.3000464.s003.pdf]
